# Supplementary material for: Dissecting causes for improved survival among patients with acute myeloid leukemia in two different eras receiving identical regimens in sequential randomized studies
Source: PubMed Central journal article supplement (PMC6127140; doi:10.1038/s41408-018-0121-4), 2018-08-22
Supplement: 41408_2018_121_MOESM1_ESM.pdf [file 41408_2018_121_MOESM1_ESM.pdf]

## **Supplementary Appendix**

This appendix has been provided by the authors to give readers additional information about their work.

Supplement to: Tiong IS, Reynolds J, Bradstock KF, Seymour JF, and Wei AH, on behalf of the Australasian Leukaemia & Lymphoma Group. Dissecting causes for improved survival among patients with acute myeloid leukemia in two different eras receiving identical regimens in sequential randomized studies.

Supplementary Tables: 3

Supplementary Figures: 6

**Table S1.** Univariate and multivariate analysis of predictor of 30-day mortality by logistic regression in the AMLM7 and AMLM12 study cohorts.

| Factors                          | Univariate Analysis |         | Multivariate Analysis* |         |
|----------------------------------|---------------------|---------|------------------------|---------|
|                                  | Odds Ratio (95% CI) | P-value | Odds Ratio (95% CI)    | P-value |
| Cohort: AMLM7                    | 2.85 (1.56–5.34)    | .002    | 3.46 (1.83–6.69)       | < .001  |
| Age                              | 1.07 (1.03–1.11)    | < .001  | 1.08 (1.04–1.12)       | < .001  |
| Gender: Male                     | 0.73 (0.40–1.32)    | .3      | -                      |         |
| ECOG PS > 0                      | 2.20 (1.18–4.31)    | .017    | 1.76 (0.91–3.55)       | .1      |
| Adverse cytogenetics             | 1.38 (0.63–2.77)    | .4      | -                      |         |
| WCC, every 10x10 <sup>9</sup> /L | 1.07 (1.02–1.11)    | .003    | 1.06 (1.01–1.10)       | .019    |
| Febrile                          | 1.39 (0.73–2.56)    | .3      | -                      |         |
| Bleeding                         | 1.62 (0.82–2.99)    | .1      | -                      |         |
| DIC                              | 2.69 (0.76–7.47)    | .081    | 2.44 (0.63–7.74)       | .2      |
| G-CSF                            | 0.58 (0.26–1.47)    | .2      | -                      |         |

\* Factors were included in the multivariate analysis if  $p < 0.10$  by univariate analysis.

*Abbreviations:* CI, confidence interval; DIC, disseminated intravascular coagulation; ECOG, Eastern Cooperative Oncology Group; G-CSF, granulocyte colony stimulating factor; PS, performance status; WCC, white cell counts.

**Table S2.** Supportive care in the AMLM7 and AMLM12 study cohorts.

|                                 | <b>AML7</b> | <b>AML12</b> | <b>P-value</b> |
|---------------------------------|-------------|--------------|----------------|
| Prophylactic antifungal*, n (%) | 75 (86.2)   | 397 (95.9)   | .001           |
| Fluconazole / Itraconazole      | 75 (100)    | 283 (71.3)   |                |
| Posaconazole / Voriconazole     | -           | 149 (37.5)   |                |
| Amphotericin                    | 3 (4.0)     | 33 (8.3)     |                |
| Infection, n (%)                |             |              | .7             |
| None                            | 8 (8.3)     | 51 (12.0)    |                |
| Probable                        | 21 (21.9)   | 84 (19.8)    |                |
| Clinical                        | 11 (11.5)   | 43 (10.1)    |                |
| Microbiological                 | 56 (58.3)   | 246 (58.0)   |                |
| Days febrile, median (IQR)      | 10.5 (5–17) | 10 (6–15)    | .7             |
| G-CSF (%)                       | 80.1        | 96.7         | < .001         |
| Palifermin, n (%)               | -           | 74 (17.5)    |                |
| RBC (units), median (IQR)       | 10 (8–14)   | 12 (8–15)    | .089           |
| PLT (units), median (IQR)       | 9 (7–15)    | 10 (8–14)    | .185           |

\*Many patients received >1 antifungal agent at different time points.

*Abbreviations:* G-CSF, granulocyte colony stimulating factor; IQR, interquartile range; PLT, platelets; RBC, red blood cells.

**Table S3.** Characteristics of patients who received standard IcE consolidation from the AMLM7 and AMLM12 (original and matched) study cohorts.

|                                             | <b>AML7<br/>(n=87)</b> | <b>M12_original<br/>(n=146)</b> | <b>P-<br/>value<sup>a</sup></b> | <b>M12_matched<sup>b</sup><br/>(n=87)</b> | <b>P-<br/>value<sup>a</sup></b> |
|---------------------------------------------|------------------------|---------------------------------|---------------------------------|-------------------------------------------|---------------------------------|
| Age, median years (IQR)                     | 41.8<br>(33.3–50.6)    | 48.0<br>(38.8–55.3)             | .001                            | 41.8<br>(33.2–52.7)                       | .6                              |
| Male gender (%)                             | 52.9                   | 53.4                            | 1                               | 51.7                                      | 1                               |
| ECOG PS > 0 (%)                             | 44.8                   | 59.4                            | .041                            | 46.0                                      | 1                               |
| Cytogenetics, n (%)                         |                        |                                 | .6                              |                                           | 1                               |
| Intermediate                                | 69 (79.3)              | 122 (83.6)                      |                                 | 69 (79.3)                                 |                                 |
| Adverse                                     | 13 (14.9)              | 19 (13.0)                       |                                 | 13 (14.9)                                 |                                 |
| Unknown                                     | 5 (5.8)                | 5 (3.4)                         |                                 | 5 (5.8)                                   |                                 |
| WCC (x 10 <sup>9</sup> /L),<br>median (IQR) | 10.1<br>(3.9–31.0)     | 11.6<br>(3.9–37.5)              | .6                              | 11.3<br>(4.9–37.0)                        | .5                              |
| > 40 x 10 <sup>9</sup> /L (%)               | 16.1                   | 24.0                            | .2                              | 23.0                                      | .3                              |
| > 100 x 10 <sup>9</sup> /L (%)              | 4.6                    | 6.2                             | .8                              | 3.5                                       | 1                               |
| >1 induction cycle, n (%)                   | 3 (3.5)                | 9 (6.2)                         | .5                              | 5 (5.7)                                   | .7                              |
| Allo-SCT, n (%)                             | 30 (34.5)              | 85 (58.2)                       | <.001                           | 53 (60.9)                                 | <.001                           |
| Transplant in first CR                      | 9 (10.3)               | 39 (26.7)                       | .003                            | 24 (27.6)                                 | .006                            |
| Transplant other status                     | 21 (24.1)              | 46 (31.5)                       | .3                              | 29 (33.3)                                 | .2                              |
| Auto-SCT, n (%)                             | 12 (13.8)              | 4 (2.7)                         | .002                            | 1 (1.2)                                   | .002                            |

<sup>a</sup> Fisher's exact test for categorical variables; Mann-Whitney *U* tests for continuous variables.

<sup>b</sup> Propensity score matching by regression including age, gender, WBC and cytogenetic risk group. Matching was done using the nearest neighbor method with 1:1 ratio without replacement.

*Abbreviations:* CR, complete remission; DIC, disseminated intravascular coagulation; ECOG PS, Eastern Cooperative Oncology Group performance status; G-CSF, granulocyte colony stimulating factor; IQR, interquartile range; SCT, stem cell transplantation; WCC, white cell counts.

**Figure S1. (A)** Overall survival and **(B)** cumulative hazard of early deaths in the entire AMLM7 and AMLM12 cohorts, stratified by period of study recruitment. **(C)** Percentage of patients (%) receiving GCSF (line and dots) and prophylactic posaconazole/voriconazole (bar chart) over time (AML7: 1995-2000; AMLM12: 2003-2010).

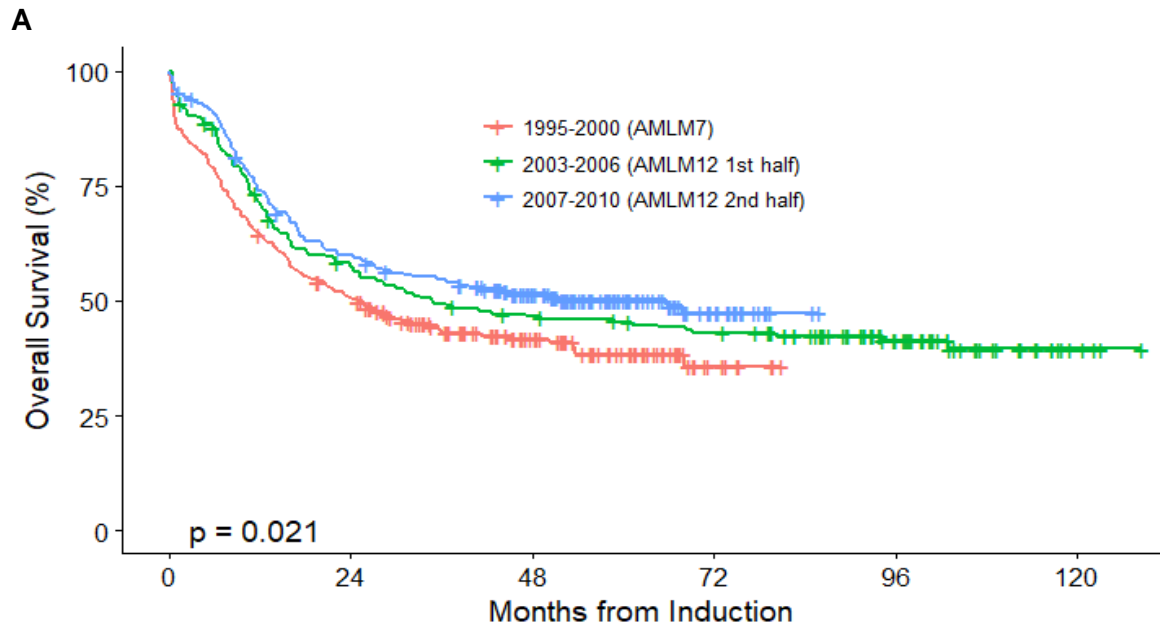

No. at Risk

|                            | 0   | 24  | 48 | 72 | 96 | 120 |
|----------------------------|-----|-----|----|----|----|-----|
| 1995-2000 (AML7)           | 256 | 127 | 57 | 8  | 0  | 0   |
| 2003-2006 (AML12 1st half) | 186 | 103 | 81 | 72 | 38 | 4   |
| 2007-2010 (AML12 2nd half) | 236 | 138 | 92 | 23 | 0  | 0   |

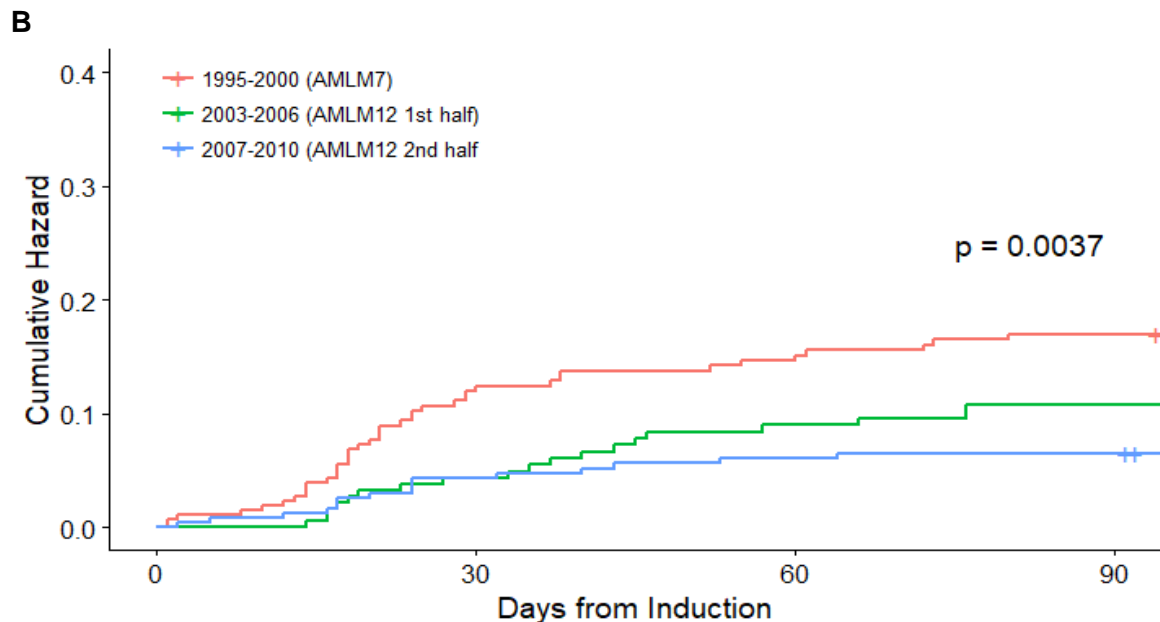

Cumulative No. of Events

|                            | 0 | 30 | 60 | 90 |
|----------------------------|---|----|----|----|
| 1995-2000 (AML7)           | 0 | 30 | 36 | 40 |
| 2003-2006 (AML12 1st half) | 0 | 8  | 16 | 19 |
| 2007-2010 (AML12 2nd half) | 0 | 10 | 14 | 15 |

C

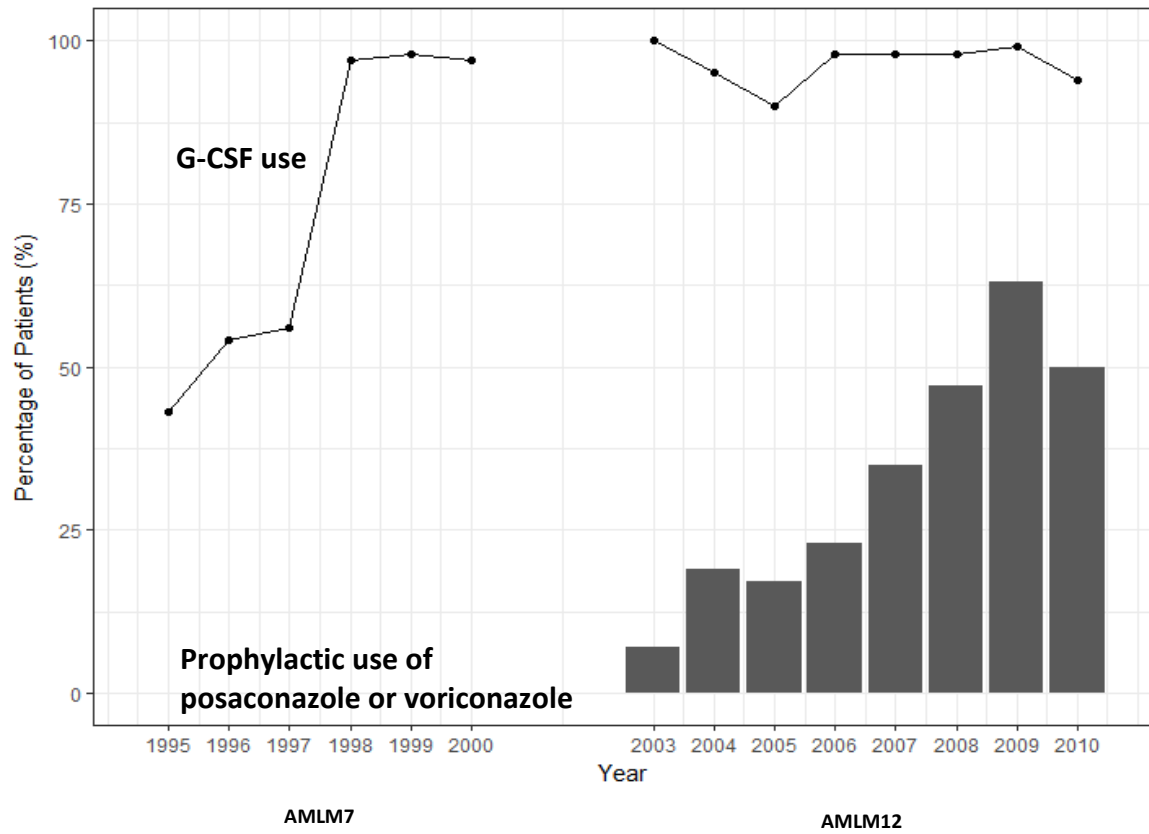

**Figure S2.** Overall survival censoring for SCT (both autologous and allogeneic) in patients receiving standard IcE consolidation in the AMLM7 and AMLM12 study cohorts. **(A)** Unmatched comparison between study cohorts. **(B)** Propensity score matching for age, gender, ECOG, WCC and cytogenetic risk.

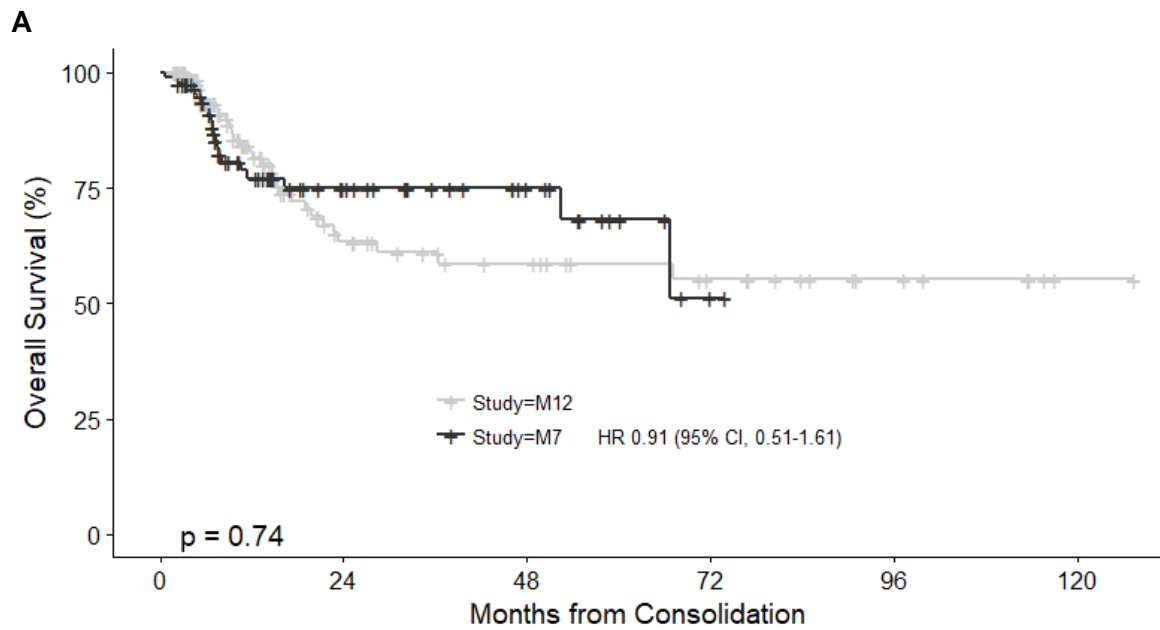

No. at Risk

|   |     |    |    |    |   |   |
|---|-----|----|----|----|---|---|
| — | 146 | 33 | 22 | 14 | 7 | 1 |
| — | 87  | 28 | 13 | 1  | 0 | 0 |

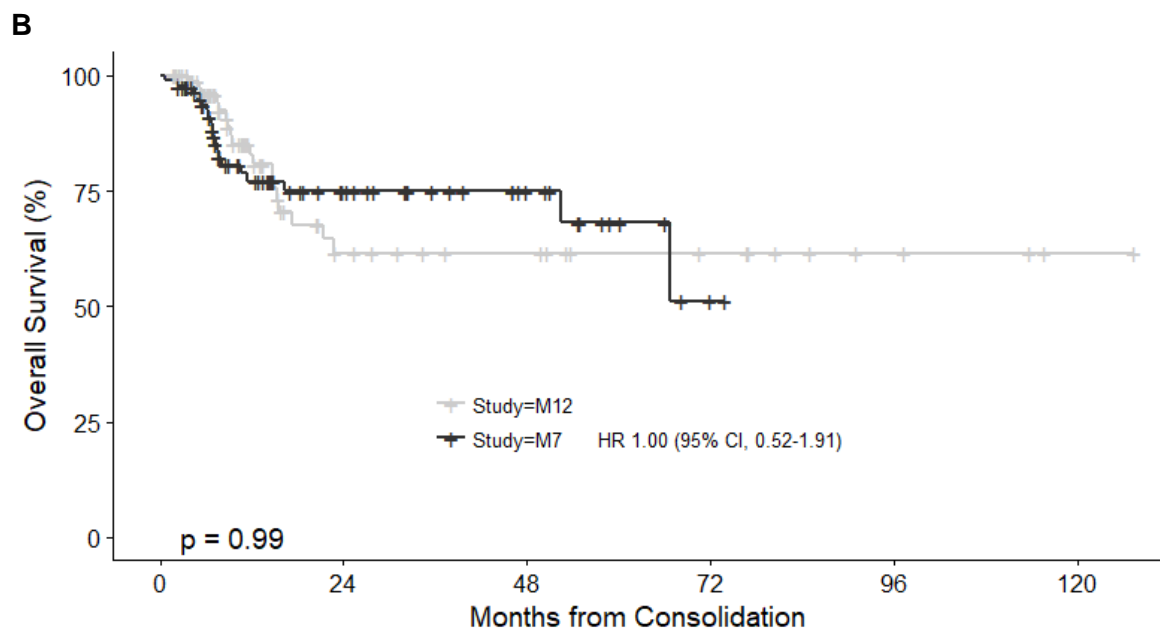

No. at Risk

|   |    |    |    |   |   |   |
|---|----|----|----|---|---|---|
| — | 87 | 19 | 14 | 9 | 4 | 1 |
| — | 87 | 28 | 13 | 1 | 0 | 0 |

**Figure S3.** Cumulative incidence of relapse in patients receiving standard IcE consolidation in the AMLM7 and AMLM12 study cohorts, **(A)** ignoring SCT status (both autologous and allogeneic) and **(B)** treating SCT as competing risk.

**A**

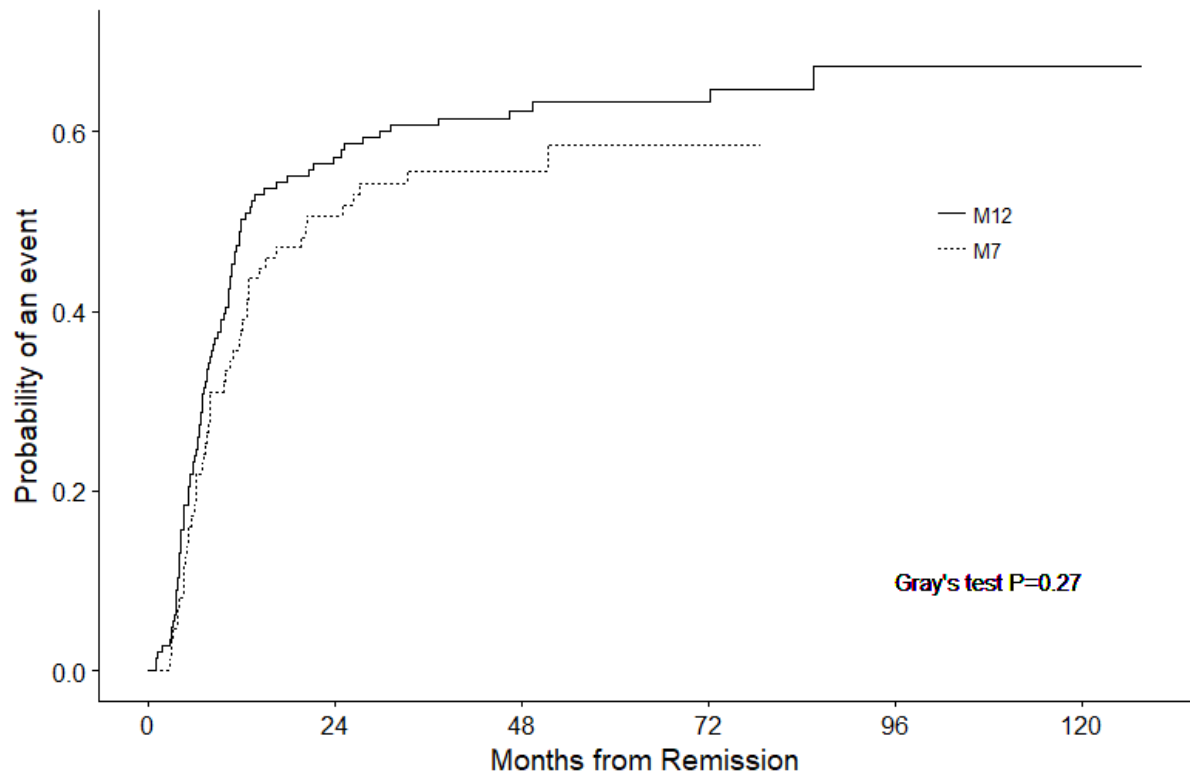

**B**

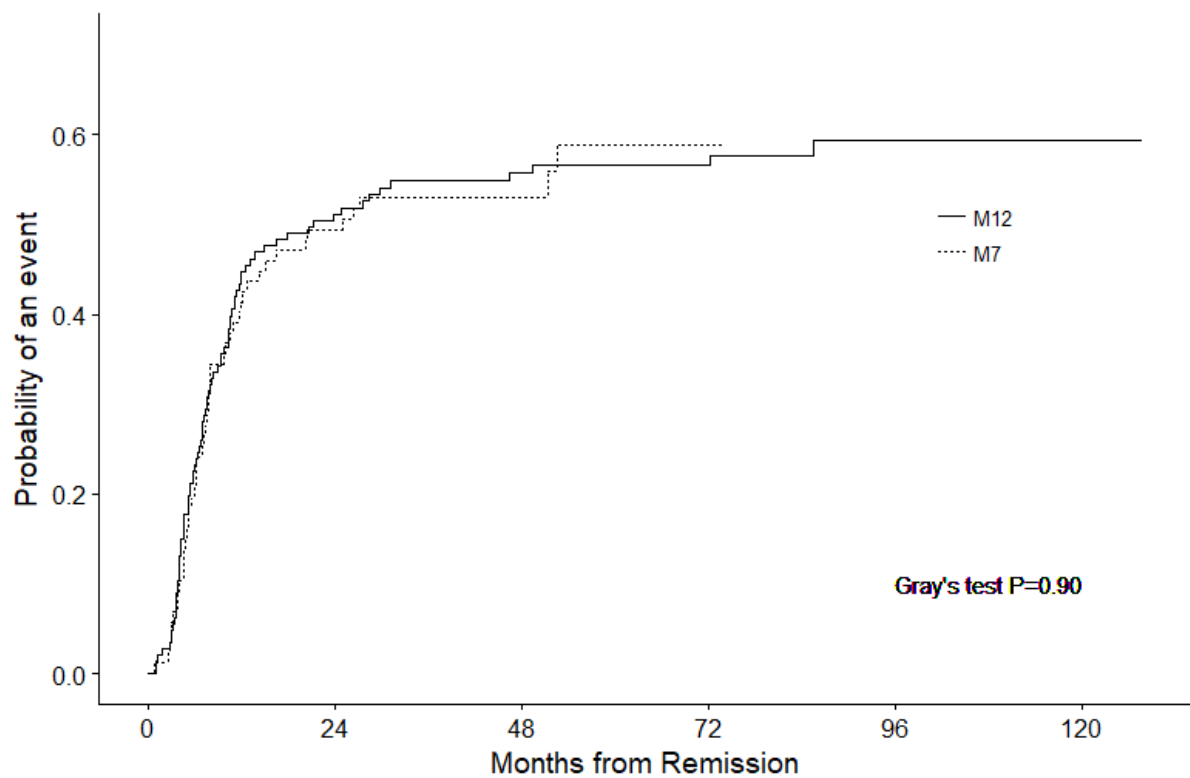



**Figure S4.** Overall survival in the AMLM7 study cohort receiving standard IcE consolidation chemotherapy, restricted to patients with >90 days of remission duration, stratified by **(A)** allogeneic SCT and **(B)** autologous SCT in first remission. Pairwise comparisons using log-rank test, with p-values adjusted by Benamini & Hochberg (BH) method.

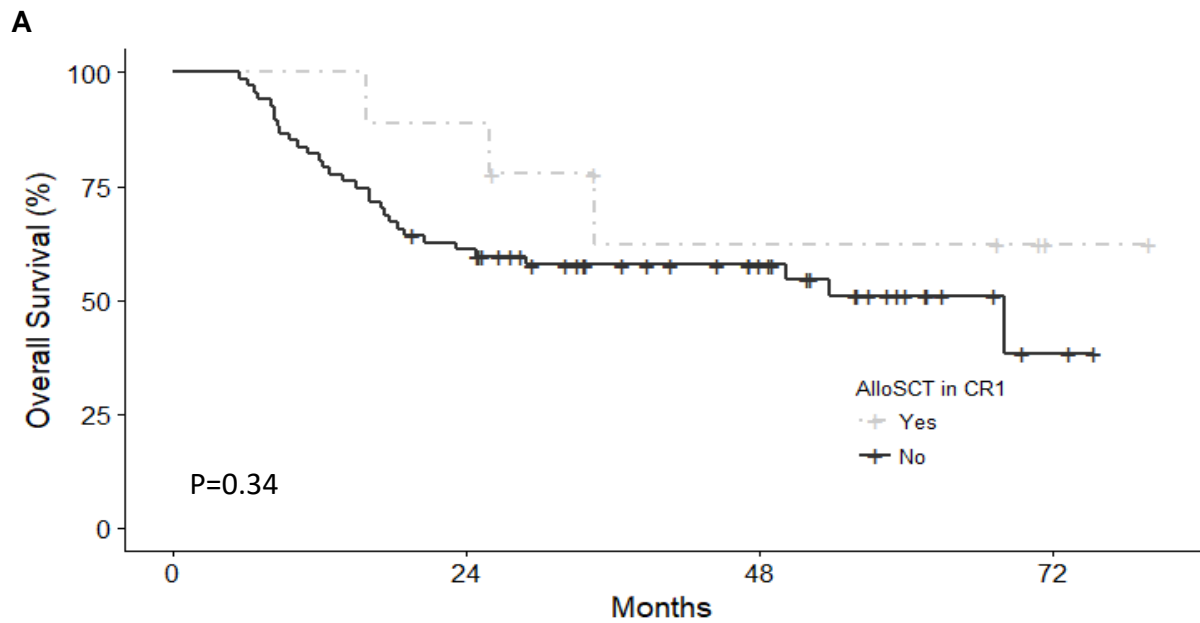

No. at Risk

|   |    |    |    |   |
|---|----|----|----|---|
| — | 9  | 8  | 4  | 1 |
| — | 67 | 40 | 20 | 2 |

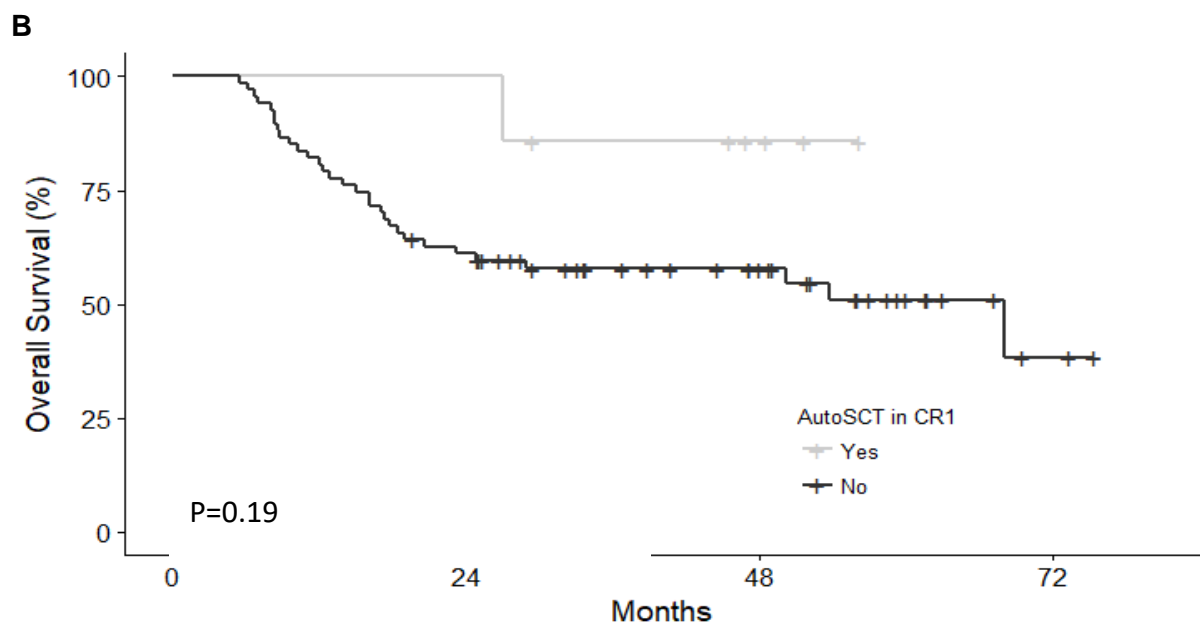

No. at Risk

|   |    |    |    |   |
|---|----|----|----|---|
| — | 7  | 7  | 3  | 0 |
| — | 67 | 40 | 20 | 2 |

**Figure S5.** Overall survival after initial relapse of acute myeloid leukaemia, **(A)** in the entire AMLM7 and AMLM12 study cohorts and **(B)** following subsequent allogeneic stem cell transplantation in patients surviving >90 days from relapse.

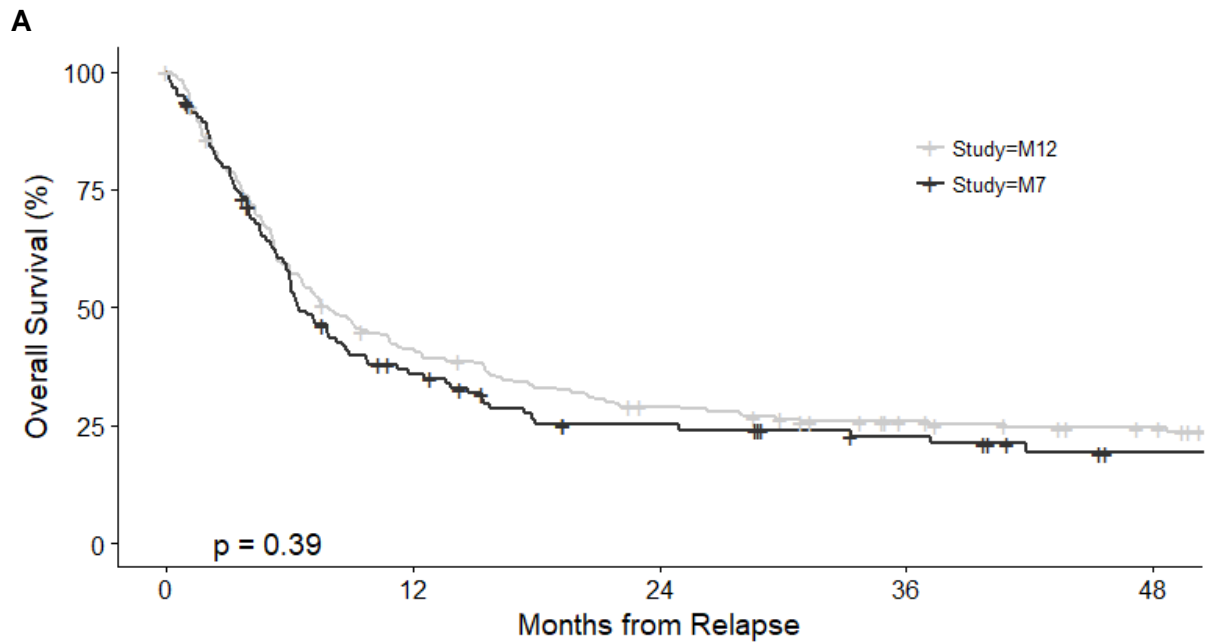

No. at Risk

|   |     |    |    |    |    |
|---|-----|----|----|----|----|
| — | 207 | 82 | 55 | 41 | 33 |
| — | 114 | 36 | 21 | 15 | 8  |

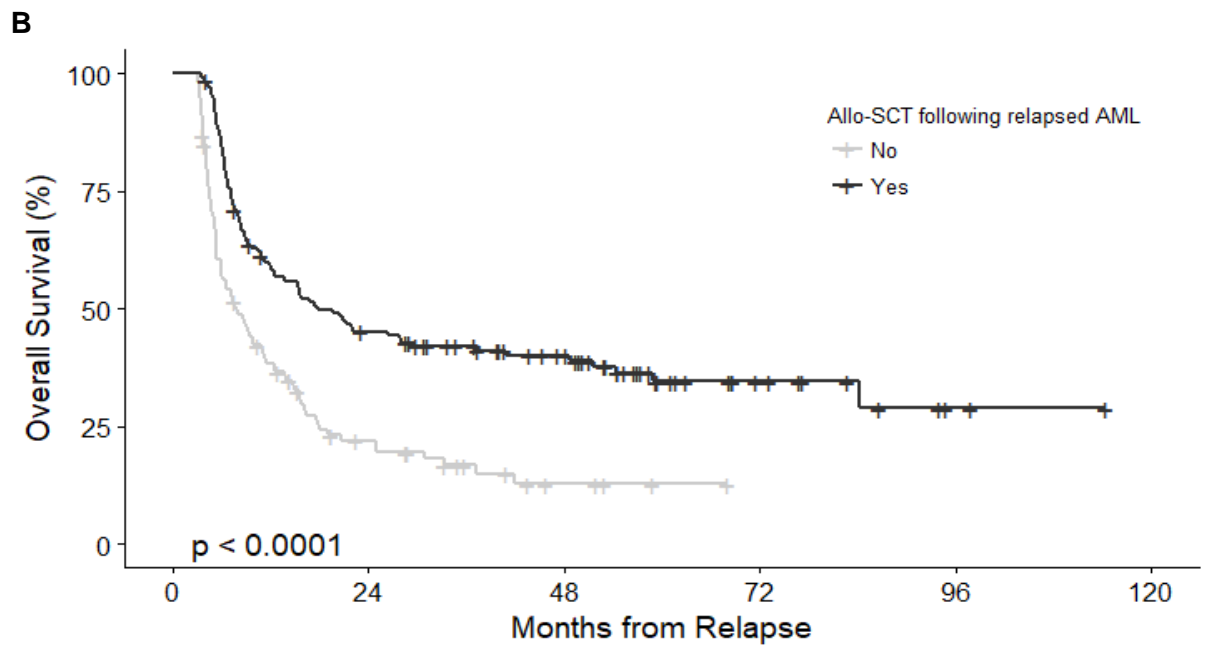

No. at Risk

|   |     |    |    |    |   |   |
|---|-----|----|----|----|---|---|
| — | 113 | 18 | 4  | 0  | 0 | 0 |
| — | 136 | 58 | 37 | 10 | 2 | 0 |

**Figure S6.** Overall survival according to recruiting volume in the **(A)** AMLM12 and **(B)** AMLM7 study cohorts.

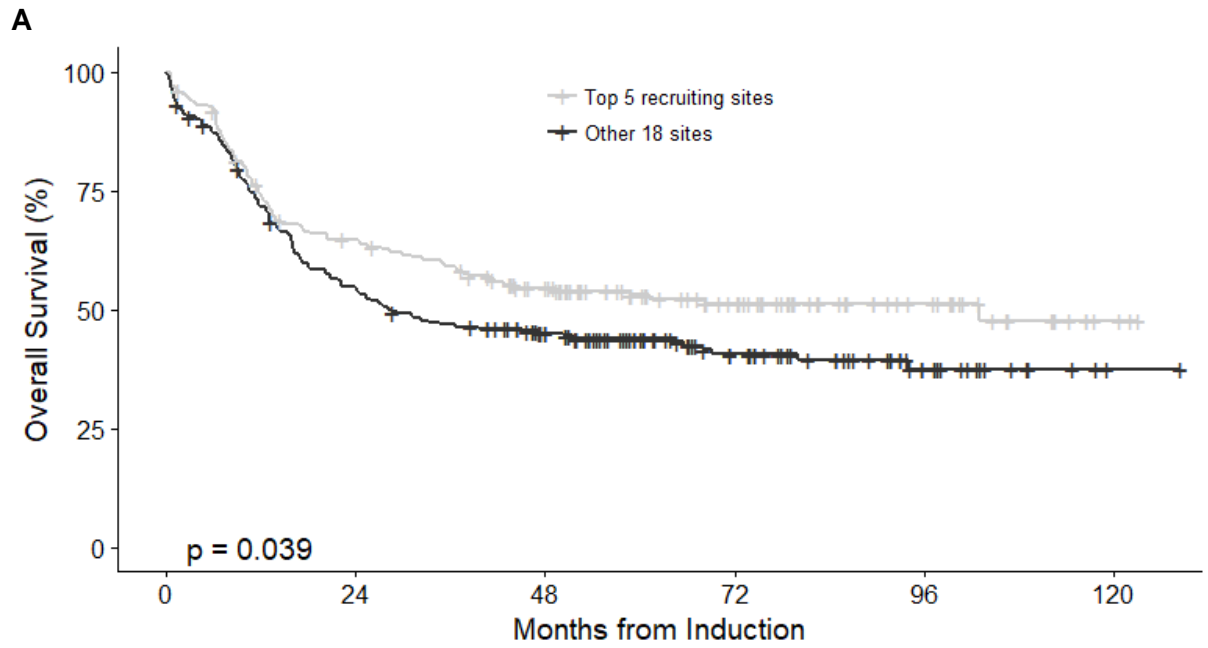

No. at Risk

|   |     |     |    |    |    |   |
|---|-----|-----|----|----|----|---|
| — | 188 | 117 | 85 | 50 | 22 | 3 |
| — | 234 | 124 | 88 | 45 | 16 | 1 |

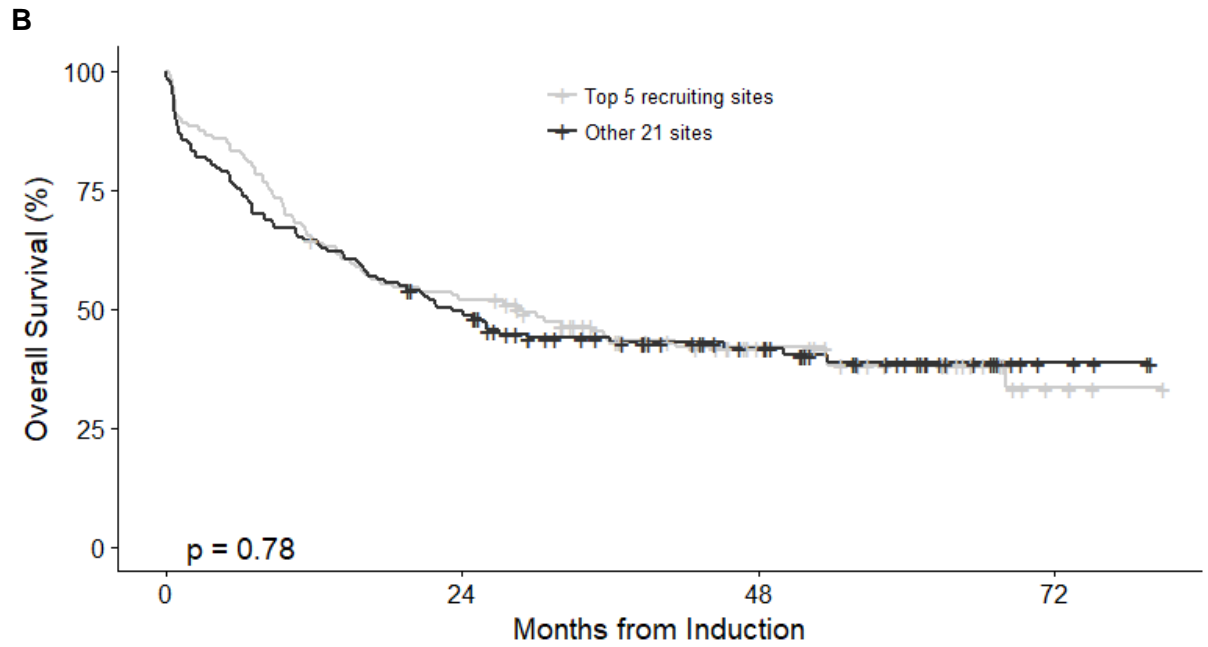

No. at Risk

|   |     |    |    |   |
|---|-----|----|----|---|
| — | 119 | 61 | 25 | 4 |
| — | 137 | 66 | 32 | 4 |
